# Supplementary material for: The Scalable Solid-State Synthesis of a Ni5P4/Ni2P–FeNi Alloy Encapsulated into a Hierarchical Porous Carbon Framework for Efficient Oxygen Evolution Reactions
Source: MDPI journal article supplement (doi:10.3390/nano12111848), 2022-05-28
Supplement: s1 [file s1]

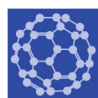

## Supplementary Material

# The Scalable Solid-State Synthesis of a $\text{Ni}_5\text{P}_4/\text{Ni}_2\text{P}$ -FeNi Alloy Encapsulated into a Hierarchical Porous Carbon Framework for Efficient Oxygen Evolution Reactions

Xiangyun Tian <sup>1</sup>, Peng Yi <sup>1</sup>, Junwei Sun <sup>2</sup>, Caiyun Li <sup>1</sup>, Rongzhan Liu <sup>1,3,\*</sup> and Jian-Kun Sun <sup>2,\*</sup><sup>1</sup> College of Textiles and Clothing, Qingdao University, Qingdao 266071, China;

txy3287425946@163.com (X.T.); yp13792668731@163.com (P.Y.); 17864235865@163.com (C.L.)

<sup>2</sup> College of Chemistry and Chemical Engineering, Qingdao University, Qingdao 266071, China; sunjunwei121@163.com<sup>3</sup> Collaborative Innovation Center for Eco-Textiles of Shandong Province and the Ministry of Education, Qingdao University, Qingdao 266071, China

\* Correspondence: qdulrz760504@163.com (R.L.); sunjk@qdu.edu.cn (J.-K.S.)

## 1. Experimental section

### 1.1. Preparation of the S-NaCl, S-NaHCO<sub>3</sub> and M-NaCl/NaHCO<sub>3</sub> catalysts.

Sole NaCl (5.627 mmol), sole NaHCO<sub>3</sub> (3.807 mmol) and the mixture of NaCl (5.627 mmol) and NaHCO<sub>3</sub> (3.807 mmol) were respectively grinded with Fe(NO<sub>3</sub>)<sub>3</sub>·6H<sub>2</sub>O (0.625 mmol), Ni(NO<sub>3</sub>)<sub>2</sub>·6H<sub>2</sub>O (1.876 mmol) and chitosan (1 g) in an agate mortar to a homogenous mixture. Then, these mixture were calcined at 700 °C at Argon atmosphere. After rinsing repeatedly with deionized water and ethanol, followed by drying at 60 °C for 2 h, the final pyrolysis products were labeled as S-NaCl, S-NaHCO<sub>3</sub>, M-NaCl/NaHCO<sub>3</sub>, respectively.

### 1.2. Preparation of the $\text{Ni}_5\text{P}_4/\text{Ni}_2\text{P}@C$ .

NiCl<sub>2</sub>·6H<sub>2</sub>O (1.876 mmol), Na<sub>2</sub>CO<sub>3</sub> (4.717 mmol) and chitosan (1 g) were vigorously grinded in an agate mortar to a homogenous mixture. Then the powders were annealed at 700 °C for 2 h in Argon atmosphere, the carbonized samples have been fully washed and dried (Ni@C). Following the classic phosphating method, Ni@C furnace maintained at 350 °C for 2 h under Argon atmosphere at a heating rate of 5 °C min<sup>-1</sup>. The final black products were denoted as  $\text{Ni}_5\text{P}_4/\text{Ni}_2\text{P}@C$ .

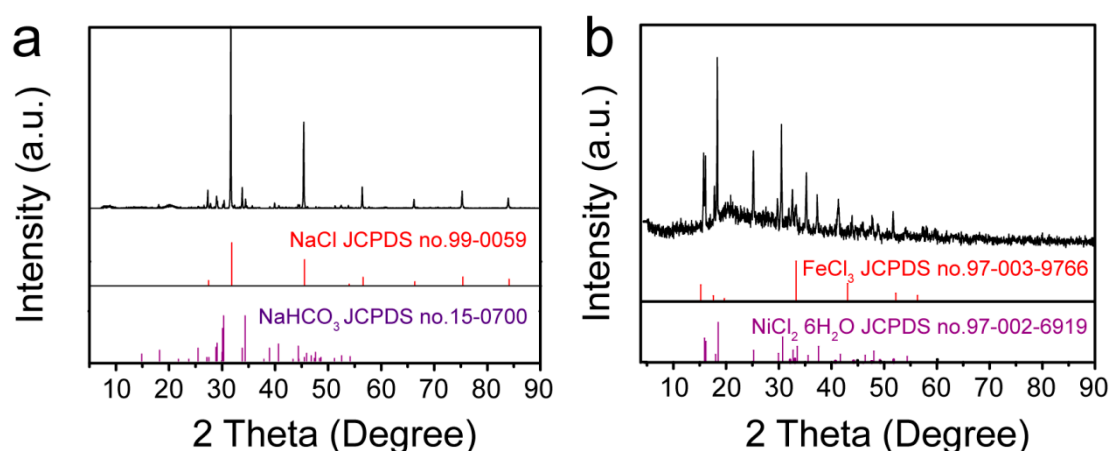

**Figure S1.** XRD patterns of the solid grinding product based on the precursors with the Na<sub>2</sub>CO<sub>3</sub> (a), or without the Na<sub>2</sub>CO<sub>3</sub> addition (b).

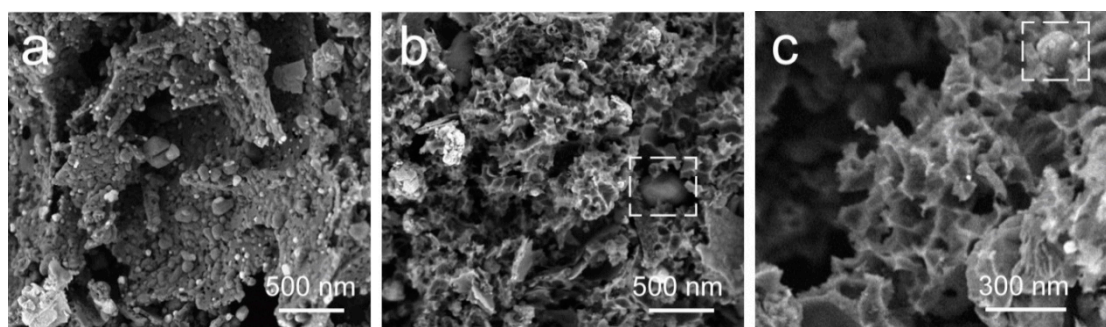

**Figure S2.** SEM images of pyrolysis product. (a) S-NaCl, (b) S-NaHCO<sub>3</sub> and (c) M-NaCl/NaHCO<sub>3</sub>.

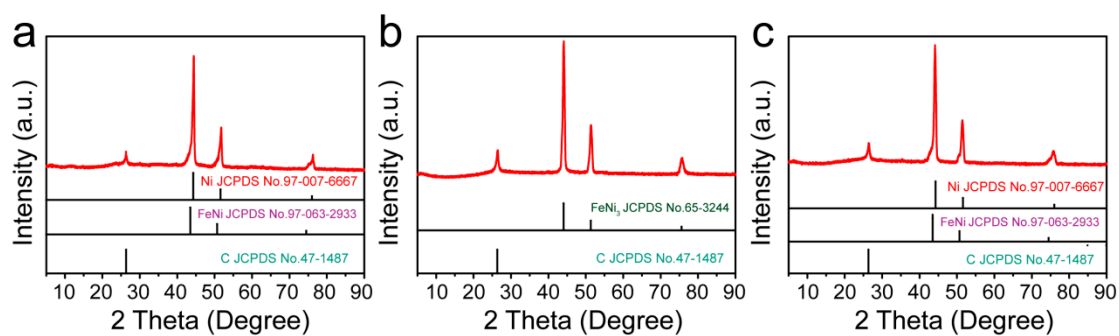

**Figure S3.** XRD patterns of pyrolysis product. (a) S-NaCl, (b) S-NaHCO<sub>3</sub> and (c) M-NaCl/NaHCO<sub>3</sub>.

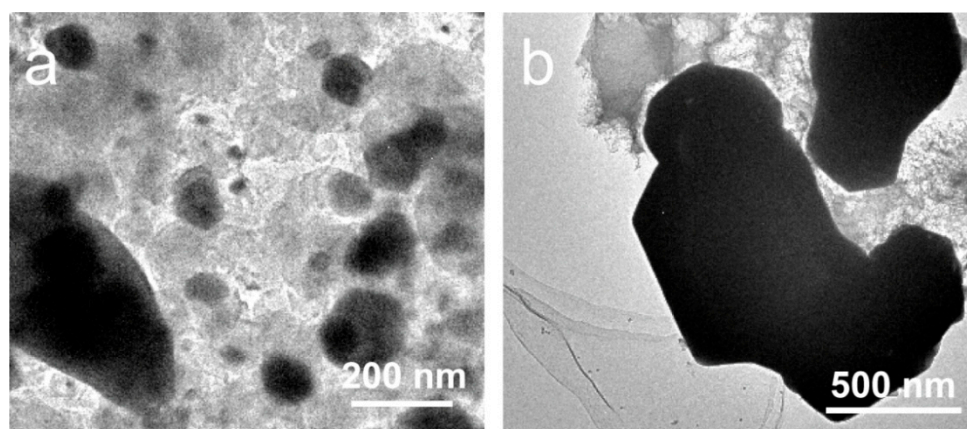

**Figure S4.** Low-magnification TEM images of (a) Ni-FeNi@C and (b) FeNi<sub>3</sub>@AC sample.

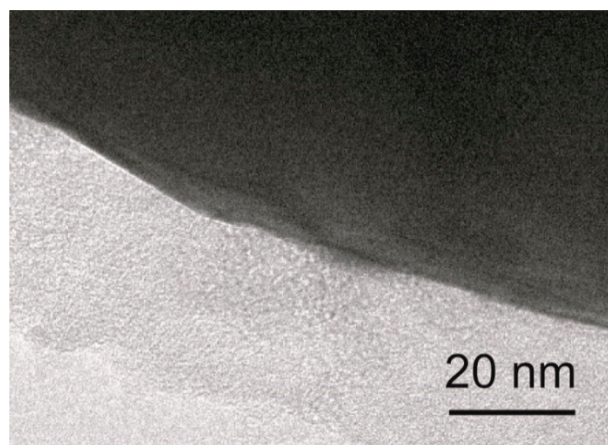

**Figure S5.** HRTEM image of FeNi<sub>3</sub>@AC sample.

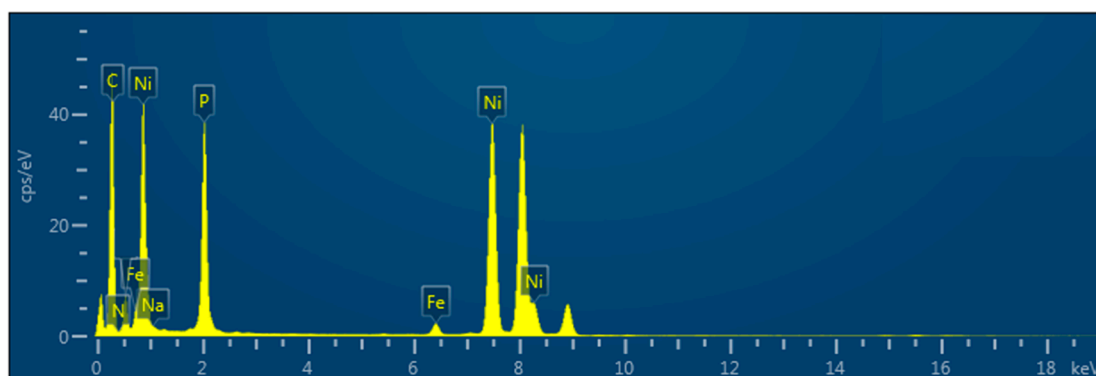

**Figure S6.** EDS spectrum of  $\text{Ni}_5\text{P}_4/\text{Ni}_2\text{P}-\text{FeNi}@C$ .

**Table S1.** Elemental contents of the  $\text{Ni}_5\text{P}_4/\text{Ni}_2\text{P}-\text{FeNi}@C$  sample.

| Elements | wt %  | atomic percentage |
|----------|-------|-------------------|
| C        | 42.60 | 70.73             |
| P        | 18.94 | 12.19             |
| Fe       | 6.02  | 6.06              |
| Ni       | 32.44 | 11.02             |

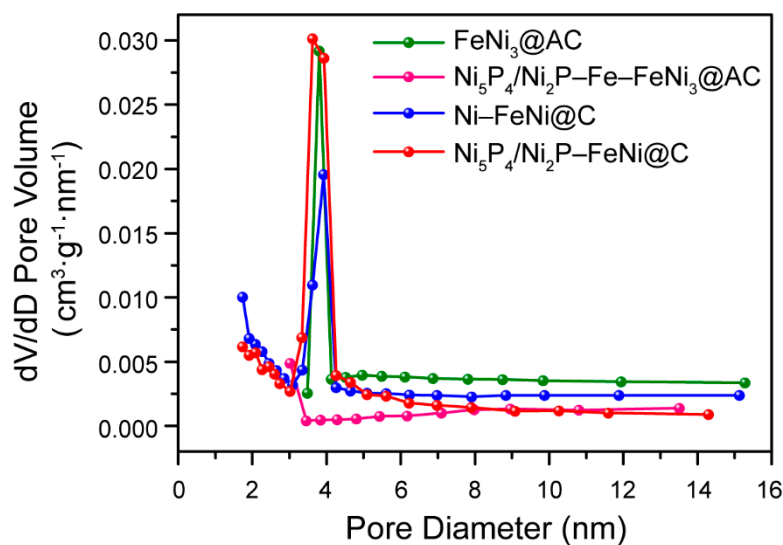

**Figure S7.** Pore size distribution curves of  $\text{FeNi}_3@AC$ ,  $\text{Ni}-\text{FeNi}@C$ ,  $\text{Ni}_5\text{P}_4/\text{Ni}_2\text{P}-\text{Fe}-\text{FeNi}_3@AC$  and  $\text{Ni}_5\text{P}_4/\text{Ni}_2\text{P}-\text{FeNi}@C$  samples.

**Table S2.** Comparison of surface area properties of as-prepared catalysts.

| Samples                                                                | BET Surface Area ( $\text{m}^2/\text{g}$ ) | BJH Desorption average pore diameter (nm) | BJH Desorption cumulative volume of pores between 17.000 Å and 3,000.000 Å diameter ( $\text{cm}^3/\text{g}$ ) |
|------------------------------------------------------------------------|--------------------------------------------|-------------------------------------------|----------------------------------------------------------------------------------------------------------------|
| $\text{FeNi}_3@AC$                                                     | 143.32                                     | 16.24                                     | 0.19                                                                                                           |
| $\text{Ni}_5\text{P}_4/\text{Ni}_2\text{P}-\text{Fe}-\text{FeNi}_3@AC$ | 12.12                                      | 20.48                                     | 0.09                                                                                                           |
| $\text{Ni}-\text{FeNi}@C$                                              | 182.12                                     | 14.62                                     | 0.21                                                                                                           |
| $\text{Ni}_5\text{P}_4/\text{Ni}_2\text{P}-\text{FeNi}@C$              | 82.13                                      | 8.23                                      | 0.10                                                                                                           |

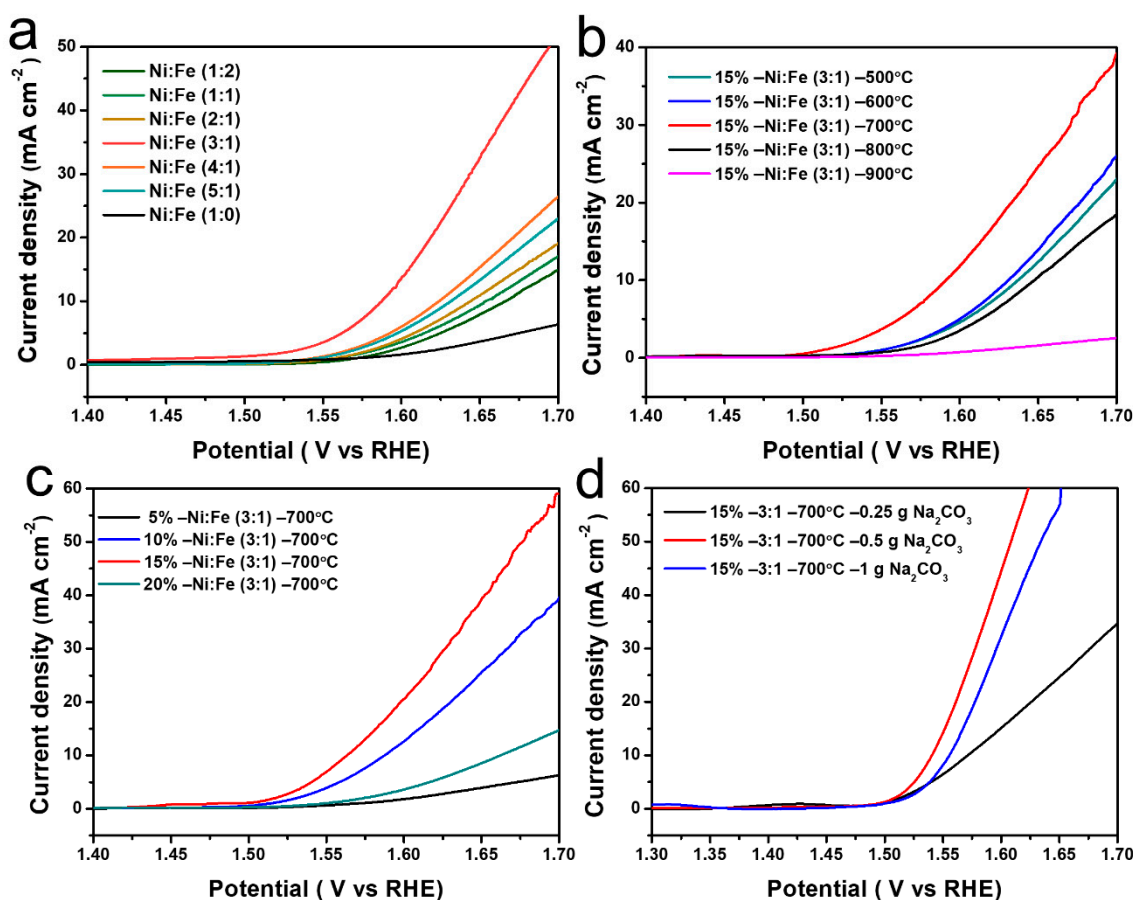

**Figure S8.** The OER LSV curve of  $\text{Ni}_5\text{P}_4/\text{Ni}_2\text{P}-\text{FeNi@C}$  catalyst based on different synthesis conditions. (a) The ratio of nickel to iron. (b) The pyrolysis temperature. (c) The total amount of metals. (d) The amount of  $\text{Na}_2\text{CO}_3$  addition.

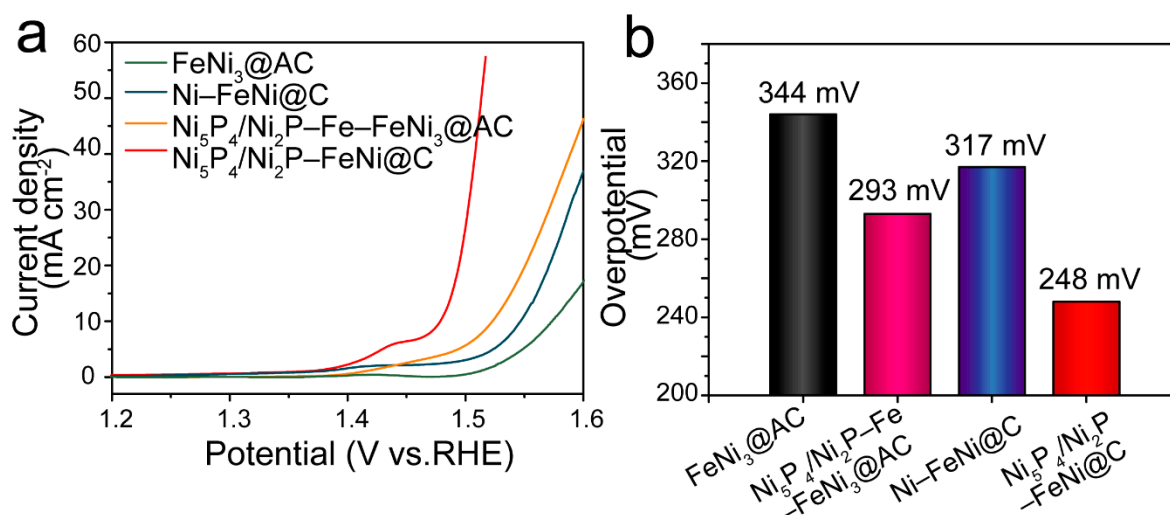

**Figure S9.** (a) 85% iR-corrected OER LSV curves of  $\text{FeNi}_3@\text{AC}$ ;  $\text{Ni}-\text{FeNi@C}$ ;  $\text{Ni}_5\text{P}_4/\text{Ni}_2\text{P}-\text{Fe}-\text{FeNi}_3@\text{AC}$  and  $\text{Ni}_5\text{P}_4/\text{Ni}_2\text{P}-\text{FeNi@C}$  samples prepared by balling-milling methods in 1 M KOH electrolyte. (b) The comparative overpotentials of different catalysts at a current density of  $10 \text{ mA cm}^{-2}$ .



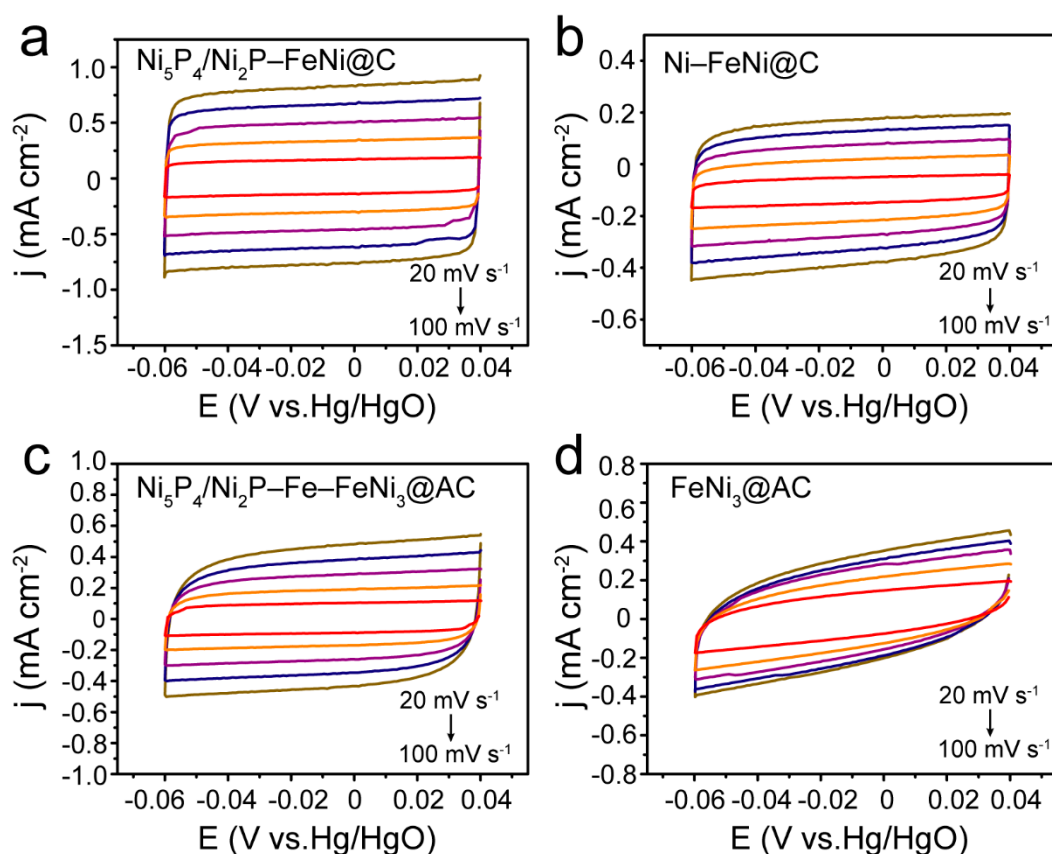

**Figure S10.** CV curves versus scan rates for different electrode catalysts at scan rates ranging from 20 mV s<sup>-1</sup> to 100 mV s<sup>-1</sup> with an interval point of 20 mV s<sup>-1</sup>. (a)  $\text{Ni}_5\text{P}_4/\text{Ni}_2\text{P}-\text{FeNi}@C$ ; (b)  $\text{Ni}-\text{FeNi}@C$ ; (c)  $\text{Ni}_5\text{P}_4/\text{Ni}_2\text{P}-\text{Fe}-\text{FeNi}_3@AC$  and (d)  $\text{FeNi}_3@AC$ .

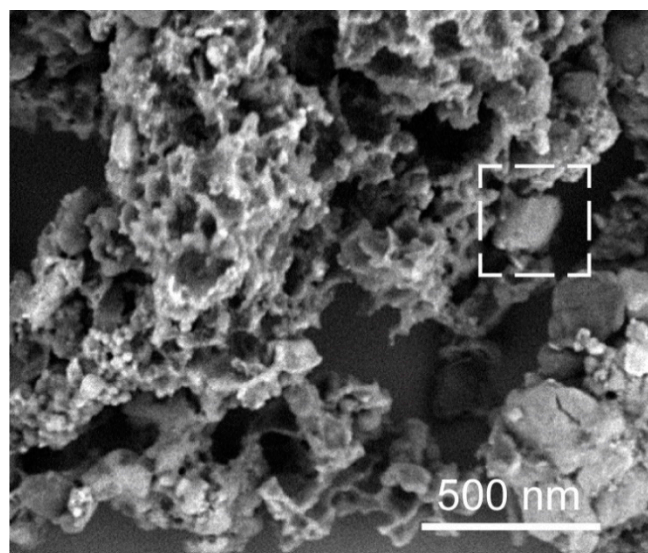

**Figure S11.** SEM image of  $\text{Ni}_5\text{P}_4/\text{Ni}_2\text{P}-\text{FeNi}@C$  after 140 h stability test at 20 mA cm<sup>-2</sup>.

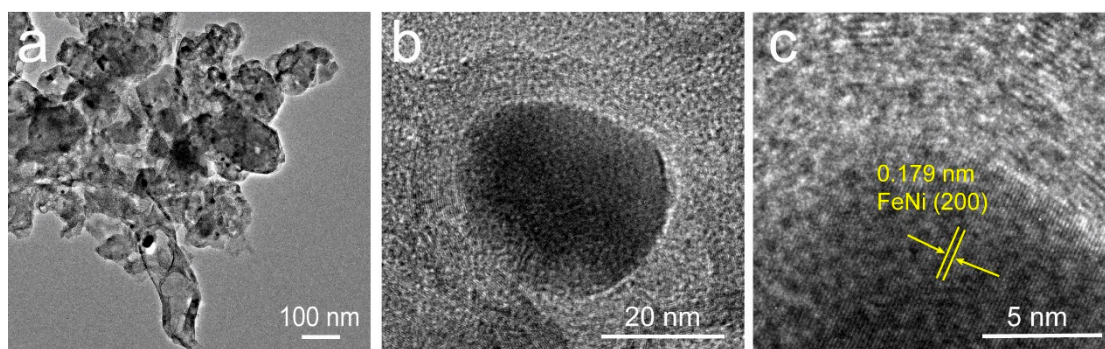

**Figure S12.** (a) TEM and (b–c) HRTEM images of  $\text{Ni}_5\text{P}_4/\text{Ni}_2\text{P}\text{--FeNi@C}$  sample after 140 h stability test at  $20 \text{ mA cm}^{-2}$ .

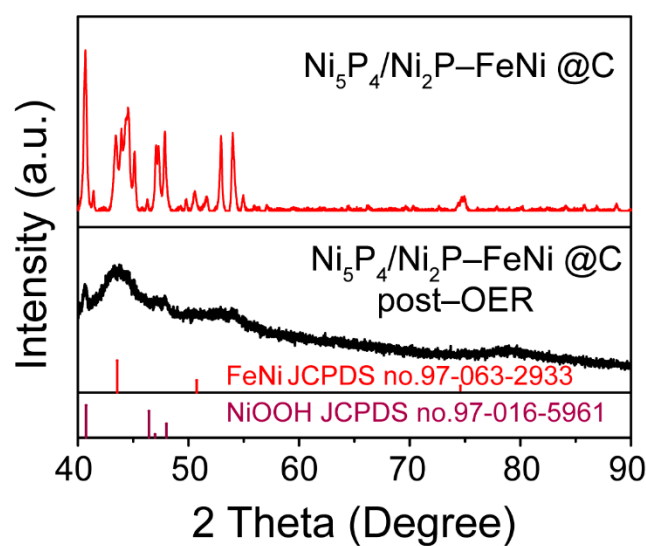

**Figure S13.** XRD patterns of the initial and post-OER  $\text{Ni}_5\text{P}_4/\text{Ni}_2\text{P}\text{--FeNi@C}$  sample.

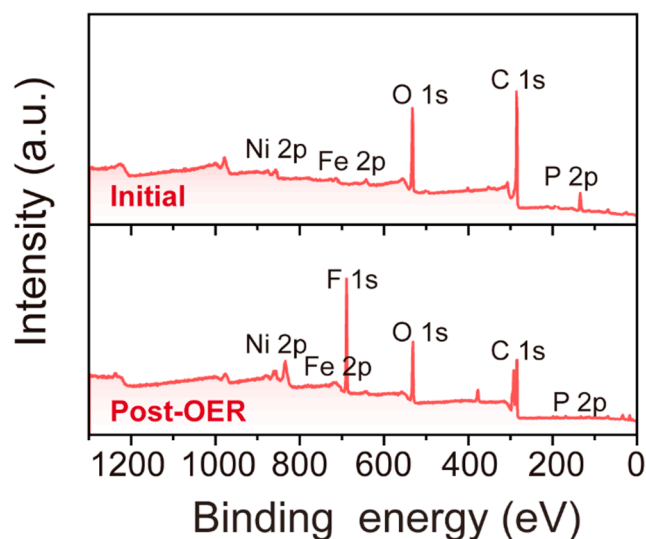

**Figure S14.** XPS survey spectrum of  $\text{Ni}_5\text{P}_4/\text{Ni}_2\text{P}\text{--FeNi@C}$  sample before and after OER process.
